# Supplementary material for: 急性骨髄性白血病患者の看護 (ナーシングプロセス 白血病)
Source: Springer Nature journal article supplement (doi:10.1007/s00106-021-01000-9), 2008-08-01
Supplement: MOESM1 [file 18881514]

**Prof. Dr. med. A. Huber**  
Klinikdirektor

**Abteilung Phoniatrie und  
Klinische Logopädie  
KD Dr. med. J. Bohlender**

Universitätsspital Zürich  
Klinik für Ohren-, Nasen-,  
Hals- und Gesichtschirurgie  
Frauenklinikstr. 24  
CH-8091 Zürich

Sekretariat +41-44-255 5830  
Telefax +41-44-255 4424  
E-Mail: Joerg.Bohlender@usz.ch

### Sydney-Schluck-Fragebogen

Name: .....  
Geburtsdatum: .....  
Geschlecht:  weiblich  männlich  
Datum: .....

Dieser Fragebogen wurde entwickelt, damit wir den Schweregrad Ihrer Schluckstörung ermitteln können. Er ist nicht kompliziert und sollte leicht in 10 Minuten auszufüllen sein. Alle Ihre Informationen werden **streng vertraulich** behandelt.

Bitte setzen Sie für jede Frage ein Kreuz „X“ auf die untenstehende Linie, um anzugeben wie schwerwiegend Ihr Schluckproblem ist.

**Beispiel:**

Sie setzen das „X“ auf der **linken** Seite der Linie, wenn Sie Ihr Problem als **gering** einschätzen, in die **Mitte**, wenn es sich um ein **mittelmässig grosses** Problem handelt und auf die **rechte** Seite der Linie, wenn Ihr Problem sehr **schwerwiegend** ist.

Sie setzen das „X“ **ganz an das linke Ende** der Linie, wenn Sie **kein** Problem haben.

1. Wie gross sind Ihre **Schwierigkeiten in letzter Zeit** beim Schlucken?

überhaupt keine Schwierigkeiten |-----| absolut unfähig zu schlucken

2. Wie viel Schwierigkeiten haben Sie, **Getränke mit dünnflüssiger Konsistenz** (wie Tee, Softdrinks, Bier oder Kaffee) zu schlucken?

überhaupt keine Schwierigkeiten |-----| absolut unfähig zu schlucken

3. Wie viel Schwierigkeiten bereitet Ihnen das **Schlucken von dickflüssigen Getränken oder Speisen** (wie Milchshake, Suppe oder Vanillesosse)?

überhaupt keine Schwierigkeiten |-----| absolut unfähig zu schlucken

4. Wie viel Schwierigkeiten bereitet Ihnen das **Schlucken von weichen Nahrungsmitteln** (wie Apfelmus, Rührei oder Kartoffelpüree)?

überhaupt keine Schwierigkeiten |-----| absolut unfähig zu schlucken

5. Wie viel Schwierigkeiten bereitet Ihnen das **Schlucken von festen Nahrungsmitteln** (wie Steak, rohem Apfel oder roher Karotte)?

überhaupt keine Schwierigkeiten |-----| absolut unfähig zu schlucken

6. Wie viel Schwierigkeiten bereitet Ihnen das **Schlucken von trockenen Nahrungsmitteln** (wie Brot, Keksen oder Nüssen)?

überhaupt keine Schwierigkeiten |-----| absolut unfähig zu schlucken

7. Haben Sie Schwierigkeiten Ihren eigenen **Speichel zu schlucken**?

überhaupt keine Schwierigkeiten |-----| absolut unfähig zu schlucken

8. Haben Sie Schwierigkeiten, beim **Hinunterschlucken**?

Niemals |-----| jedes Mal, wenn ich schlucke

9. Haben Sie das Gefühl, dass Essen **in Ihrem Rachen hängen** bleibt?

Niemals |-----| jedes Mal, wenn ich schlucke

10. Müssen Sie jemals **husten oder würgen**, wenn Sie **feste Speisen** (wie Brot, Fleisch oder Äpfel) essen?

Niemals jedes Mal,  
wenn ich esse  
|-----|

11. Müssen Sie **husten oder würgen**, wenn Sie **Flüssigkeiten** (wie Kaffee, Tee, Wasser oder Bier) trinken?

Niemals jedes Mal,  
wenn ich trinke  
|-----|

12. Wie lange benötigen Sie für eine **durchschnittliche Mahlzeit**?

Bitte kreuzen Sie eine Möglichkeit an:

- Weniger als 15 Minuten
- Ungefähr 15 - 30 Minuten
- Ungefähr 30 - 45 Minuten
- Ungefähr 45 - 60 Minuten
- Mehr als 60 Minuten
- Ich kann überhaupt nicht schlucken

13. Gelangen Flüssigkeiten oder Nahrungsmittel beim Schlucken **in die Nase oder kommen aus der Nase heraus**?

Niemals jedes Mal,  
wenn ich schlucke  
|-----|

14. Müssen Sie **mehr als einmal schlucken**, damit das Essen runter geht?

Niemals jedes Mal,  
wenn ich schlucke  
|-----|

15. Müssen Sie **während einer Mahlzeit Nahrungsmittel oder Flüssigkeit hochhusten oder ausspucken**?

niemals jedes Mal,  
wenn ich esse oder trinke  
|-----|

16. Wie hoch schätzen Sie den **Schweregrad Ihres Schluckproblems heute** ein?

kein Problem extrem schwerwiegendes  
Problem



17. Wie sehr **beeinträchtigt** Ihr Schluckproblem Ihre **Lebensfreude oder Ihre Lebensqualität**?

keine  
Beeinträchtigung extrem schwere  
Beeinträchtigung

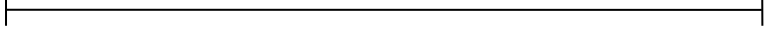

**Besten Dank für Ihre Mitarbeit**
